# Supplementary material
Source: ML conference proceedings conference paper supplement (https://openreview.net/forum?id=MaHNO7vmsj)
Supplement: supplementary_material [file attachment]

# CONCEPT-GUIDED DICTIONARY LEARNING FOR INTERPRETABLE CONCEPT EXTRACTION AND ATTRIBUTION IN LARGE VISION–LANGUAGE MODELS

**Anonymous authors**

Paper under double-blind review

## ABSTRACT

Autoregressive Large Vision-Language Models (LVLMs) generate text sequentially, conditioning each token on evolving multimodal states. This makes it difficult to assess whether predictions are grounded in **visual concepts** or instead reflect hallucination or bias. Existing concept-discovery approaches such as **TCAV**, **CRAFT**, and **CLIP-Dissect** are designed for encoder-only or contrastive models. At the same time, recent LVLM methods (CoX-LMM) depend on labeled concepts and simplified settings, limiting scalability.

We propose **Concept-Guided Dictionary Learning (CGDL)**, a weakly supervised and scalable framework for multimodal concept discovery in autoregressive LVLMs. CGDL first probes the model to surface textual concepts from a dataset. For each concept, it constructs positive and negative patch sets using concept-grounded crops using SAM and randomized backgrounds. A contrastive dictionary-learning stage then disentangles concept-aligned activations from residual noise, yielding sparse, monosemantic vectors that reveal **semantically aligned visual–textual interactions** and enable faithful attribution of predictions to visual evidence.

On **ImageNet-1k**, **MSCOCO**, CGDL outperforms recent interpretability methods with up to **4% higher sparsity**, **11% greater stability**, **17% lower overlap**, and strong attribution faithfulness, while scaling efficiently to large concept vocabularies. These results advance concept-based interpretability for LVLMs and provide a practical step toward transparent multimodal reasoning.

## 1 INTRODUCTION

Large Vision–Language Models (LVLMs) generate text *autoregressively*, conditioning each token on evolving multimodal states. This enables rich, context-sensitive prediction but raises unique interpretability challenges: predictions may stem from spurious correlations or hallucinations rather than *visual evidence*. Existing methods, such as saliency maps or training-based grounding, localize objects but do not reveal the higher-level *concepts* driving model decisions. Concept-based explanations offer more faithful insights, yet most discovery methods assume static feature spaces. Approaches like **TCAV** Kim et al. (2018), **CRAFT** Fel et al. (2023b), **CLIP-Dissect** Oikarinen & Weng (2023), and **Holistic** Fel et al. (2023a) cannot extend to autoregressive models and are restricted to single-object settings, while **CoX-LMM** Parekh et al. (2024) requires a labeled concept token and is restricted to single-object settings, limiting scalability (Table 1).

We propose **Concept-Guided Dictionary Learning (CGDL)**, a weakly supervised framework for scalable concept discovery in autoregressive LVLMs. CGDL first surfaces candidate concepts, constructs positive/negative patch sets, and then casts each as a one-vs-all representation learning problem with a two-basis decomposition. This formulation forces the dictionary to disentangle activations from residual noise, yielding sparse, non-overlapping vectors that faithfully align visual and textual modalities.

While most concept extraction methods rely on similar dictionary learning formulations, prior work has shown that the quality of discovered concepts depends more on how the data is presented to the dictionary than on the specific factorization algorithm itself Grobrügge et al. (2025); Sun et al. (2023). CGDL is not merely Semi-NMF with preprocessing; rather, it provides a general, model-agnostic

Table 1: Comparison of concept-based interpretability methods. Only **CGDL** supports weakly supervised, scalable discovery in autoregressive LVLMs; most prior methods target encoder-only (IE) models and single-object concepts, while they can not perform text grounding (TG).

| Method                               | Type    | TG | AutoReg | Key Limitation   |
|--------------------------------------|---------|----|---------|------------------|
| TCAV Kim et al. (2018)               | IE      | ✗  | ✗       | Supervised       |
| ACE Ghorbani et al. (2019)           | IE      | ✗  | ✗       | Single object    |
| CRAFT Fel et al. (2023b)             | IE      | ✗  | ✗       | Single object    |
| EAC Sun et al. (2023)                | IE      | ✗  | ✗       | Single object    |
| CLIP-Dissect Oikarinen & Weng (2023) | IE      | ✓  | ✗       | Single object    |
| Holistic Fel et al. (2023a)          | IE      | ✗  | ✗       | Single object    |
| CoX-LMM Parekh et al. (2024)         | AutoReg | ✓  | ✓       | Single object    |
| MCD Grobrügge et al. (2025)          | IE      | ✗  | ✗       | Single object    |
| <b>CGDL (Ours)</b>                   | AutoReg | ✓  | ✓       | Unlimited-object |

framework that reframes concept discovery as a contrastive one-vs-all decomposition. The two-basis design prevents atom collapse in large vocabularies, allowing CGDL to scale robustly to thousands of concepts Kim & Park (2008). By combining weakly supervised concept bags, weak localization, residual contrast, and two-basis factorization, CGDL achieves monosemantic, multimodal vectors at scale—something previous dictionary learning methods for LVLMs have not demonstrated. **Our contributions are:**

- We introduce **CGDL**, a weakly supervised framework for scalable concept discovery in autoregressive LVLMs, overcoming the single-object limitation of prior methods.
- We leverage the **Segment Anything Model (SAM)** Kirillov et al. (2023) for weak concept localization, providing high-quality positive/negative patch sets.
- We propose a contrastive residual extraction scheme that enforces monosemanticity by separating concept-vs.-No-concept activations.
- We show that CGDL yields faithful multimodal attribution, bridging visual and textual modalities using extensive experiments on **ImageNet-1k** and **MSCOCO** demonstrate superior sparsity, stability, and faithfulness over prior methods, scaling to 1k+ concepts with improved attribution quality (up to **+9% CLIPScore**, **+4% BERTScore**).

Together, these advances provide a practical step toward transparent multimodal reasoning, bridging the gap between autoregressive generation and human-understandable concept-based explanations.

## 2 RELATED WORK

A central goal in interpretability is to uncover how internal representations encode semantically meaningful concepts. Early work introduced Concept Activation Vectors (CAVs) (Kim et al., 2018), which quantify model sensitivity to human-defined concepts but require curated examples, limiting scalability. Extensions sought to automate discovery (Ghorbani et al., 2019), yet dependence on segmentation quality hindered robustness.

Alternative approaches use saliency maps (Selvaraju et al., 2017; Strumbelj & Kononenko, 2014) or training-based grounding (Kang et al., 2024; Zhang et al., 2023; Ma et al., 2024) to highlight *where* evidence lies. While effective for localization, these methods do not articulate *what* abstract concepts the model internally represents, thus complementing but not replacing concept-based explanations.

To reduce supervision, some methods decomposed hidden states into interpretable factors. NMF (Liu et al., 2025), dictionary learning with prototypes (CRAFT) (Fel et al., 2023a), PCA, UMAP, and sparse autoencoders (Pach et al., 2025) have shown promise in vision-only settings, with unifying benchmarks emerging (Fel et al., 2023a). CLIP-based concept attribution (Oikarinen & Weng, 2023; Dreyer et al., 2025) further advanced automated discovery, but these remain restricted to vision encoders. While concept extraction overlaps with mechanistic interpretability Templeton (2024); Pach et al. (2025); Elhage et al. (2022), our focus is on *single-layer monosemantic concept discovery*

in autoregressive LVLMs rather than neuron- or circuit-level analysis. Alternative approaches such as attention maps (Jain & Wallace, 2019), causal tracing (Meng et al., 2023), and linear probes (Alain & Bengio, 2018) provide useful insights but suffer from weak causal grounding, poor scalability, or reliance on labeled supervision. CGDL complements these methods by enabling weakly supervised, scalable concept discovery with reusable concept vectors.

Autoregressive Large Vision–Language Models (LVLMs) present new challenges: activations evolve across time steps, residual streams encode multiple dependencies, and concepts rarely align with a single hidden state (Templeton, 2024). CoX-LMM (Parekh et al., 2024) adapted Semi-NMF Trigeorgis et al. (2014) to LVLM activations, but struggles with (i) reliance on tokenized object names, (ii) not being suitable for multi-token concepts, (iii) background noise from full-image extraction, and (iv) persistent polysemanticity in residual streams. One could extend the single-object concept extraction in CoX-LMM by extracting residual streams for sets of (*token*, *image*) pairs, but this remains inherently supervised and fails to overcome the aforementioned limitations.

While methods such as TCAV, CRAFT, and CLIP-Dissect pioneered concept-based interpretability, they target static encoders and cannot be applied to LVLMs. CoX-LMM incorporates many of these ideas into a dictionary-learning framework for autoregressive models, and thus serves as the most representative baseline. We therefore compare CGDL against CoX-LMM using its strongest dictionary learning variants (SNMF, SAE) to ensure fairness.

Unlike CoX-LMM and other concept extraction methods that rely on labeled tokens and often yield polysemantic vectors or assume single-object settings, we propose **Concept-Guided Dictionary Learning (CGDL)**. CGDL introduces contrastive residual extraction with spatially localized crops and candidate text, enforcing a clean separation between *concept* and *noise*. This produces faithful, monosemantic concept vectors and, to the best of our knowledge, is the first framework to scale weakly supervised concept discovery from single-object to multi-object settings.

### 3 PRELIMINARIES

#### 3.1 DICTIONARY-LEARNING VIEW OF CONCEPT EXTRACTION

Recent work on concept extraction Ghorbani et al. (2019); Sun et al. (2023); Fel et al. (2023a); Parekh et al. (2024) shows that many methods can be framed as *dictionary learning*, where activations are approximated by a small set of interpretable bases.

Formally, given activations  $S \in \mathbb{R}^{n \times d}$  with  $n$  samples and  $d$ -dimensional features, we posit  $K$  latent concepts and solve

$$\arg \min_{U \in \mathbb{R}^{d \times K}, V \in \mathbb{R}^{n \times K}} \|S - UV^\top\|_F^2,$$

where  $U = [u_1, \dots, u_K]$  are the **concept bases** (CAVs) and  $V = [v_1^\top; \dots; v_n^\top]$  are the **activations**, with row  $v_i$  giving concept coordinates of sample  $i$ .

This factorization unifies prior approaches via constraints on  $(U, V)$ :

$$\begin{cases} v_i \in \{e_1, \dots, e_K\}, & \text{K-Means (ACE) Ghorbani et al. (2019),} \\ U^\top U = I, & \text{PCA Graziani et al. (2023),} \\ S \geq 0, U \geq 0, V \geq 0, & \text{NMF (CRAFT Fel et al. (2023a;b), )} \\ U \text{ free, } V \geq 0, & \text{Semi-NMF (SNMF) Trigeorgis et al. (2014); Parekh et al. (2024),} \\ V = \psi(S), \|v_i\|_0 \leq s, & \text{Sparse Autoencoder (SAE) Templeton (2024); Pach et al. (2025).} \end{cases}$$

Columns of  $U$  are concept vectors (CAVs), rows of  $V$  are per-sample activations. Special cases include PCA (orthogonal bases), NMF (nonnegative factors), SNMF (mixed-sign bases with nonnegative activations), K-Means (one-hot codes), and SAE (encoder-decoder with sparsity).

## 162 4 METHOD

163  
164 We begin by formalizing LVLMs as black-box systems with accessible intermediate activations,  
165 taking multimodal inputs (text, image) and producing corresponding outputs (text/ set of tokens).  
166

### 167 4.1 POSITIVE AND NEGATIVE CONCEPTS

168  
169 We address the limitations of single-object dependence and polysemantic behavior in CoX-LMM  
170 by introducing *concept-example bags*—collections of image patches that serve as positive (concept-  
171 present) or negative (concept-absent) instances for each automatically discovered concept  $c_k \in$   
172  $\{c_1, \dots, c_K\}$ .

173 Given an unlabeled image set  $\mathcal{I} = \{I_k\}_{k=1}^N$ , the LVLM  $f$  predicts candidate concepts for each image  
174 using a structured prompt (See Appendix B for details.):

$$175 C(I_k) = f(I_k, \text{prompt}) \subseteq \mathcal{V},$$

176 and the global vocabulary is

$$177 \mathcal{C} = \bigcup_{k=1}^N C(I_k).$$

178 For each  $c \in \mathcal{C}$ , we collect supporting images

$$181 \Phi(c) = \{I_k \mid c \in C(I_k)\}.$$

182 A patch operator  $\mathcal{P}(I_k, c) \in \{\text{crop}(I_k, c), \text{sam}(I_k, c)\}$  localizes the region associated with  $c$  Kirillov  
183 et al. (2023). Because such patches may include background context, the resulting *concept-example*  
184 *bag* is a mixture of positives and negatives:

$$185 \mathcal{B}(c) = \{\mathcal{P}(I_k, c) : I_k \in \Phi(c)\} = \mathcal{B}^+(c) \cup \mathcal{B}^-(c).$$

186 Unlike prior approaches that rely on annotated single-object images, this formulation is *weakly*  
187 *supervised* and scales to multi-object datasets. For example, the concept “stripes” may emerge from  
188 zebras, tigers, or cats, without requiring manual concept labels.

### 189 4.2 CONCEPT-GUIDED DICTIONARY LEARNING

190 According to Fel et al. (2023a), most prior concept-expansion methods rely on dictionary learning  
191 for concept extraction; CoX-LMM is no exception. The key difference lies in the data passed to the  
192 dictionary-learning algorithm, which critically affects concept quality Grobrügge et al. (2025); Sun  
193 et al. (2023).

194 Relying on long, ambiguous token sequences from open-ended captioning typically restricts analysis  
195 to the residual stream of a single token, introducing overlapping concepts Templeton (2024) and  
196 preventing dictionary elements from representing clean, disentangled semantics. Multi-object images  
197 further exacerbate this, as activations mix features from different objects.

198 We address these issues with *Concept-Guidance*, a contrastive residual extraction scheme. The model  
199 is prompted to output either the target concept  $c_k$  or  $\text{No-}c_k$ , ensuring that activations are aligned with  
200 a single concept and enforcing monosemanticity:

201  
202 prompt<sub>cg</sub> = “Does the image contain  $c_k$ ? If yes, output  $c_k$ ; otherwise, output  
203 No- $c_k$ .”  
204

205 This binary design yields cleaner, concept-focused residuals.

206 For each concept bag  $\mathcal{B}(c_k)$ , we query the model with the above prompt and collect residual activa-  
207 tions. Following Koh et al. (2020); Alam et al. (2025), we decompose the LVLM into an **embedding**  
208 **function**  $g$  (vision encoder, bridging, decoder attention) and an **output function**  $h$  (projection and  
209 softmax). Based on Fel et al. (2023a); Parekh et al. (2024), we analyze the penultimate residual  
210 layer (language\_model.norm). For an image crop  $x^{c_k} \in \mathcal{B}(c_k)$  and cached prefix  $\hat{y}_{<t}$ , the embedding  
211 function produces

$$212 a_t^{(l)} = g^{(l)}(x^{c_k}, \text{prompt}_{cg}, \hat{y}_{<t}) \in \mathbb{R}^p, \quad (1)$$

where  $p$  is the residual dimension Geva et al. (2020). The output function then predicts

$$\hat{y}_t = h^{(l)}(a_t^{(l)}). \quad (2)$$

According to Geva et al. (2020), we can average residuals across tokens in each response to obtain a concept-level embedding without losing semantic meaning.

$$s_m = \frac{1}{T_m} \sum_{t=1}^{T_m} a_t^{(l)} \in \mathbb{R}^p, \quad (3)$$

where  $T_m$  is the number of generated tokens for sample  $m$ . Collecting  $M$  such samples yields

$$S = [s_1, \dots, s_M] \in \mathbb{R}^{M \times p}, \quad (4)$$

which serves as input for concept extraction. Unlike approaches that rely solely on token embeddings, this formulation captures information from multi-token concepts (e.g., *hot dog*) rather than splitting them into isolated tokens (*hot*, *dog*).

Dictionary learning then decomposes  $S$  into concept and negation bases:

$$S \approx VU^T, \quad V \in \mathbb{R}^{M \times 2}, \quad U \in \mathbb{R}^{p \times 2}.$$

Here  $U$  contains basis vectors for  $c_k$  and  $\text{No-}c_k$ , while  $V$  captures sample activations. When restricting each bag to two bases (concept vs. negation), the per-bag cost reduces to  $\mathcal{O}(M_c p + M_c^2)$ , where  $M_c$  is the number of samples in  $\mathcal{B}(c_k)$ . Over  $K$  concepts, the total complexity scales as  $\mathcal{O}(K(M_c p + M_c^2))$ , which remains efficient for large concept sets, consistent with the per-iteration complexity of Semi-NMF Kim & Park (2008); Ding et al. (2010). This contrasts with full NMF, where larger dictionary sizes ( $K \gg 2$ ) lead to cubic dependence on  $K$ , and with Sparse Autoencoders (SAE), where training requires backpropagation through millions of parameters. By reducing each bag to two bases, our approach avoids interference among dictionary atoms and remains scalable for LVLM interpretability.

This formulation contrasts each concept against all others (akin to one-vs-all classification), capturing inter-concept relations without requiring oversized dictionaries. Unlike prior methods that entangle concepts across long sequences, Concept-Guidance yields disentangled, monosemantic residuals suitable for large-scale LVLM interpretability.

### 4.3 POSITIVE CONCEPT VECTOR IDENTIFICATION

Following visual grounding in Parekh et al. (2024), for each feature  $u \in U$  from the dictionary decomposition, we extract the *maximum activated crops (MAC)*—the top- $\alpha_{\text{MAC}}$  image patches that most strongly activate it, i.e., the highest values in the  $k$ -th column of the activation matrix  $V$ :

$$X_{k,\text{MAC}} = \{i \mid v_i^{(k)} \text{ is among the top-}\alpha_{\text{MAC}} \text{ values of } v^{(k)}\}.$$

Since each concept bag contains both  $c_k$  (positive) and  $\text{No-}c_k$  (negative) samples, we select the basis

$$k^* = \arg \max_{j \in \{0,1\}} |\{i \in X_{k,\text{MAC}} \mid \hat{y}_i = c_k\}|,$$

i.e., the one aligned with the majority of positive outputs. We then define  $u_{k^*} \in \mathbb{R}^p$  as the concept vector and  $X_{k^*,\text{MAC}}$  as its supporting crops. Repeating this across all concept bags yields a dictionary  $U = [u_1, \dots, u_K] \in \mathbb{R}^{p \times K}$  with visual groundings  $X_{\text{MAC}} = \{X_{1,\text{MAC}}, \dots, X_{K,\text{MAC}}\}$ .

For textual grounding, we use the LVLM’s output function directly. Recall that for a residual activation  $a_t^{(l)}$ , the model predicts the next token as

$$y_t = h^{(l)}(a_t^{(l)}). \quad (2)$$

Analogously, for each concept feature  $u_k$ , we compute its token distribution by applying the same output function:

$$q_k = h^{(l)}(u_k) \in \mathbb{R}^{|V|}$$

where  $|V|$  denotes the size of the model’s output vocabulary (i.e., the number of distinct tokens in the LVLM). We then select the top- $\tau$  tokens (e.g., 50) with the highest scores, remove stopwords and noise, and define the resulting set as  $X_{k,\text{MAT}}$  for concept  $u_k$ . Collecting across all concepts yields  $X_{\text{MAT}} = \{X_{1,\text{MAT}}, \dots, X_{K,\text{MAT}}\}$ .

#### 4.4 CONCEPT ATTRIBUTION AND MULTI-MODAL ALIGNMENT

Following Kim et al. (2018), we project residual activations at layer  $l$  onto the learned concept subspace  $\widehat{U} = [u_1, \dots, u_K] \in \mathbb{R}^{p \times K}$ . At the token level, concept scores are

$$\alpha_j^{(t)} = \cos\_sim(u_j, a_t^{(l)}),$$

while at the phrase level we use the mean-pooled activation  $s_m = \frac{1}{T_m} \sum_{t=1}^{T_m} a_t^{(l)}$  to compute

$$\alpha_{m,j} = \cos\_sim(u_j, s_m).$$

Thus  $a_t^{(l)}$  provides fine-grained token attribution, whereas  $s_m$  captures phrase/sentence-level semantics. The most activated concept is

$$k^* = \arg \max_j \alpha_{m,j},$$

and its groundings  $X_{\text{MAC}}[k^*]$  (visual) and  $X_{\text{MAT}}[k^*]$  (textual) provide multimodal explanations.

In the *text-only mode*, this procedure further allows us to assess whether purely textual prompts activate the same feature directions as multi-modal inputs, thereby quantifying *multi-modal alignment*. This shared projection space links visual and textual semantics, supporting faithful cross-modal interpretability.

## 5 EXPERIMENTS

### 5.1 MODEL AND DATA

We evaluate three recent instruction tuned LVLMs—**Qwen2-VL-7B** Wang et al. (2024), **Qwen2.5-VL-7B** Team (2025b), and **Gemma-3n-E4B** Team (2025a)—keeping all models *frozen* to ensure post hoc interpretability. Results for the two Qwen models are reported in the Appendix E.

For concept learning, we collect **300 examples per class** from ImageNet and MSCOCO, extracting features from the *penultimate norm* layer, shown to yield high-quality embeddings (Parekh et al., 2024; Kim et al., 2018). Evaluation uses a **disjoint set of 50 images per class** from the validation splits of ImageNet (1,000 classes) and MSCOCO (10 randomly selected objects).

Unlike CoX-LMM, which requires **ImageNet** labels and **MSCOCO** caption tokens during extraction, CGDL is weakly supervised: we collect a large pool of concept examples and retain the top 1,000 most frequent concepts for ImageNet and the top 10 for MSCOCO, with each concept bag capped at 1,600 cropped patches. This setup allows us to study scalability across very different concept set sizes, while keeping comparisons fair against CoX-LMM, which requires ground-truth labels for multiple concepts. Images are resized to 500 pixels in width and cropped into  $200 \times 200$  windows with 0.2 overlap, yielding on average 5–6 crops per image. This makes the effective number of samples per bag comparable to the 300 full images used in CoX-LMM.

We compare **CGDL** against CoX-LMM Parekh et al. (2024) using two dictionary-learning methods: Sparse Autoencoders (SAE) Pach et al. (2025) and Semi-Nonnegative Matrix Factorization (SNMF) Trigeorgis et al. (2014). We also include a simple baseline, **SIMPLE**, which tests whether residuals with the highest  $l_2$ -norm align with concepts.

Ground-truth concepts are defined by image class labels, with correctness measured by top-1 alignment. For faithfulness testing, we evaluate on the same 10 MSCOCO objects.

### 5.2 EVALUATION METRICS

Concept discovery can be framed as a special case of dictionary learning. Following the evaluation protocol of Fel et al. (2023a), we first assess the quality of discovered features using three standard metrics: **Sparsity** ( $\uparrow$ ), **Stability** ( $\downarrow$ ), and **Overlap** ( $\downarrow$ ). Based on these results, SNMF emerges as the most suitable method for downstream evaluation.

Scalability is evaluated with both 10 and 1,000 concepts, demonstrating that purity and uniqueness are maintained as the number of concepts grows. Attribution quality Parekh et al. (2024) is measured

using **CLIPScore** and **BERTScore**, which remain standard for text–image and text–text alignment. CLIP Radford et al. (2021) provides cross-modal contrastive alignment, while BERT Devlin et al. (2019) captures contextual semantics through bidirectional encoding.

Faithfulness is assessed using **concept insertion** and **concept deletion** curves Fel et al. (2023a); Kadir et al. (2023), which quantify performance shifts as important concepts are progressively inserted or removed. We report results across the top-1, top-2, and top-3 concepts ranked by their influence on model output.

Finally, qualitative analyses highlight representative extracted concepts and their textual groundings, and illustrate their application to binary classification and text-to-concept alignment.

### 5.3 RESULTS

Table 2 reports quantitative results for **concept vectors** extracted from **Gemma-3n-E4B** on ImageNet and MSCOCO. We compare CGDL with CoX-LMM across three dictionary-learning settings (SNMF, SAE, SIMPLE). CGDL–SNMF consistently achieves the best performance, with the highest sparsity, lowest stability, and lowest overlap. SAE also benefits from concept guidance, while SIMPLE remains weak with low sparsity and high overlap. These results highlight that concept guidance substantially improves the quality of learned concept vectors, particularly under SNMF Fel et al. (2023a); Parekh et al. (2024).

| Method  | Dictionary Learning | ImageNet    |             |             | MSCOCO      |             |             |
|---------|---------------------|-------------|-------------|-------------|-------------|-------------|-------------|
|         |                     | Spars. ↑    | Stab. ↓     | Overlap ↓   | Spars. ↑    | Stab. ↓     | Overlap ↓   |
| CoX-LMM | SNMF                | 0.96        | 0.13        | 0.25        | <b>1.00</b> | 0.02        | 0.16        |
|         | SAE                 | 0.84        | 0.21        | 0.27        | 0.97        | 0.17        | 0.28        |
|         | SIMPLE              | 0.07        | 0.79        | 0.68        | 0.63        | 0.91        | 0.84        |
| CGDL    | SNMF                | <b>1.00</b> | <b>0.02</b> | <b>0.08</b> | <b>1.00</b> | <b>0.00</b> | <b>0.06</b> |
|         | SAE                 | 0.90        | 0.16        | 0.10        | <b>1.00</b> | 0.05        | 0.16        |
|         | SIMPLE              | 0.52        | 0.64        | 0.67        | 0.80        | 0.49        | 0.54        |

Table 2: Concept vector evaluation on ImageNet and MSCOCO. Higher sparsity is better; lower stability and overlap are better. CGDL–SNMF yields the best results across both datasets.

Table 3 presents attribution results for **Gemma-3n-E4B** on ImageNet and MSCOCO. We evaluate two aspects of alignment: (i) **BERTScore**, which measures semantic correspondence between top-activated concept groundings and ground-truth labels, and (ii) **CLIPScore**, which assesses multimodal consistency between concept groundings and input images. We compare our method (CGDL) against CoX-LMM under three settings: **Text-only**, where activations are probed via class names; **Image-only**, where short visual descriptions are used; and **Combined**, where the model predicts concept presence ( $c_k$  vs. UNK). Random baselines correspond to assigning concepts uniformly at random, which yields nearly constant values due to dataset distribution. Across datasets and metrics, **CGDL with SNMF** consistently achieves stronger alignment and outperforms CoX-LMM in all modalities, despite requiring substantially less supervision. This advantage holds across both small-scale (10 concepts, MSCOCO) and large-scale (1,000 concepts, ImageNet) evaluations.

We evaluate the *concept attribution ranking* using established *faithfulness metrics* Fel et al. (2023a), namely **concept deletion (C-Deletion)** and **concept insertion (C-Insertion)**, on the MSCOCO validation set. For each image, the model is prompted to classify the input, and the top-3 activated concepts are identified from the residual embeddings (Sec. 4.4). Attribution faithfulness is then measured as follows:

1. **C-Deletion**: progressively set to zero the coordinates corresponding to the most influential concept directions, ranked by gradient magnitude with respect to the highest-probability token, and record the drop in output probability.
2. **C-Insertion**: start from a zero vector and gradually add concept coordinates in the same order, recording the corresponding probability increase.

Table 3: Comparison of CGDL and CoX-LMM on CLIPScore and BERTScore across datasets and concept types. Higher metric values indicate better alignment.

| Method  | Dataset  | Concept | Metric    | Random          | Text-only                         | Image-only                        | Combined                          |
|---------|----------|---------|-----------|-----------------|-----------------------------------|-----------------------------------|-----------------------------------|
| CGDL    | ImageNet | 1,000   | CLIPScore | $0.52 \pm 0.04$ | –                                 | <b><math>0.62 \pm 0.08</math></b> | <b><math>0.67 \pm 0.09</math></b> |
|         |          |         | BERTScore | $0.71 \pm 0.06$ | $0.78 \pm 0.07$                   | $0.84 \pm 0.08$                   | $0.86 \pm 0.10$                   |
|         | MSCOCO   | 10      | CLIPScore | $0.48 \pm 0.04$ | –                                 | $0.60 \pm 0.06$                   | $0.64 \pm 0.08$                   |
|         |          |         | BERTScore | $0.71 \pm 0.01$ | <b><math>0.89 \pm 0.06</math></b> | <b><math>0.91 \pm 0.05</math></b> | <b><math>0.93 \pm 0.07</math></b> |
| CoX-LMM | ImageNet | 1,000   | CLIPScore | $0.49 \pm 0.04$ | –                                 | $0.57 \pm 0.03$                   | $0.58 \pm 0.05$                   |
|         |          |         | BERTScore | $0.71 \pm 0.00$ | $0.74 \pm 0.08$                   | $0.75 \pm 0.06$                   | $0.82 \pm 0.09$                   |
|         | MSCOCO   | 10      | CLIPScore | $0.51 \pm 0.04$ | –                                 | $0.57 \pm 0.10$                   | $0.55 \pm 0.05$                   |
|         |          |         | BERTScore | $0.71 \pm 0.01$ | $0.83 \pm 0.01$                   | $0.79 \pm 0.09$                   | $0.73 \pm 0.11$                   |

Scores are averaged across tokens for each image, then aggregated over the validation set. Results are summarized in Figure 1.

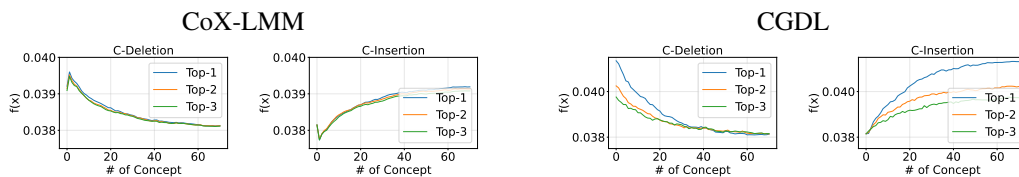

Figure 1: Faithfulness comparison of CoX-LMM and CGDL using concept deletion and insertion. CoX-LMM yields relatively flatter curves with weak separation across ranks, whereas CGDL preserves a clear order ( $\text{Top-1} > \text{Top-2} > \text{Top-3}$ ), with sharper degradation under deletion and stronger recovery under insertion. This shows that CGDL produces more faithful and discriminative concept rankings.

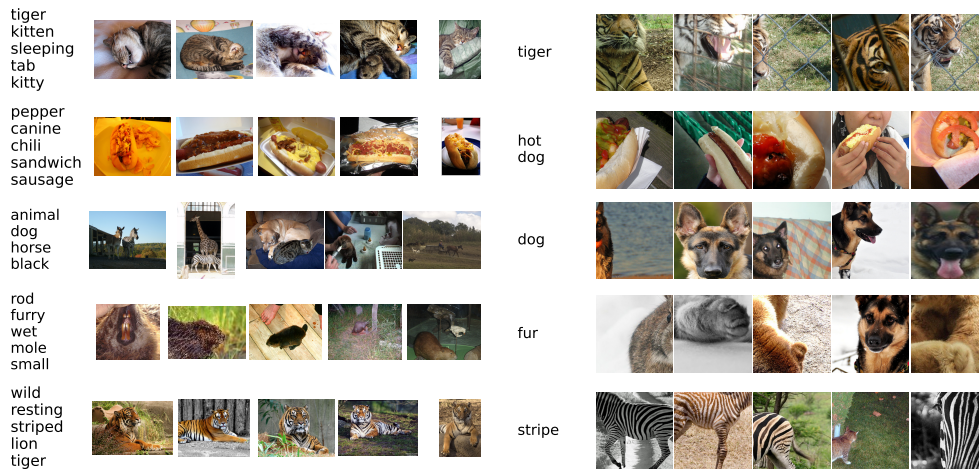

Figure 2: Qualitative examples of concept representations extracted from ImageNet. CoX-LMM (left) concepts often ground to multiple unrelated or overlapping tokens (e.g., “canine” linked to “hot dog”), reflecting polysemantic vectors. In several cases, concepts mix distinct animals: for example, *tiger* grounds across multiple concepts, while *lion* is misrepresented as *tiger*. Such cases illustrate non-monosemantic behavior, where concept vectors capture blended rather than distinct semantics. In contrast, CGDL (right) discovers fine-grained and monosemantic concepts (e.g., fur, dog, stripes).

Figure 2 compares ImageNet concepts extracted by CoX-LMM (left) and CGDL (right). CGDL yields fine-grained, monosemantic representations (e.g., fur, stripes), whereas CoX-LMM produces

entangled groundings that mix semantics (e.g., tiger conflated with lion or multiple animals). Figure 3 shows attribution in three settings: (i) binary classification, (ii) open-ended classification, and (iii) text-image alignment. In each case, attribution is explained by retrieving the nearest concept examples to the residual activation, demonstrating robust multimodal alignment.

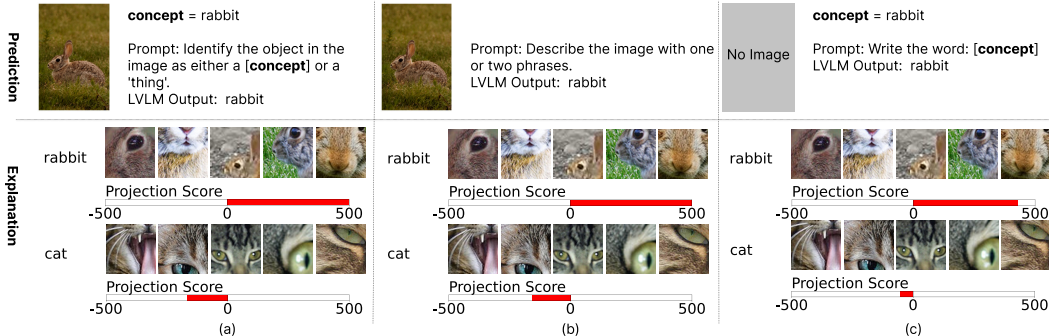

Figure 3: Attribution-based explanation using concepts (a) Aligned image-text concepts yield strong feature attribution. (b) An image-only input without concept information still triggers a relevant feature. (c) Text alone activates semantically meaningful features, demonstrating robust multimodal alignment.

## 6 ABLATION STUDY

We test multiple variants of the contrastive prompt template (See AppendixB for details). Table 4 shows only minor fluctuations in CLIPScore, indicating robustness to phrasing. Qwen-2 exhibits slightly higher variance than Qwen2.5 and Gemma-3n.

Table 4: Mean  $\pm$  std. of CLIPScore across binary prompts on MSCOCO-10. Abbreviations: Q-2 = Qwen-2, Q-2.5 = Qwen2.5, G-3n = Gemma-3n.

| Prompt | Q-2             | Q-2.5           | G-3n            | Prompt | Q-2             | Q-2.5           | G-3n            |
|--------|-----------------|-----------------|-----------------|--------|-----------------|-----------------|-----------------|
| P1     | 0.57 $\pm$ 0.10 | 0.65 $\pm$ 0.13 | 0.62 $\pm$ 0.08 | P3     | 0.57 $\pm$ 0.14 | 0.62 $\pm$ 0.07 | 0.62 $\pm$ 0.06 |
| P2     | 0.58 $\pm$ 0.07 | 0.63 $\pm$ 0.11 | 0.64 $\pm$ 0.08 | P4     | 0.59 $\pm$ 0.11 | 0.63 $\pm$ 0.08 | 0.64 $\pm$ 0.09 |

## CONCLUSION

We introduced *Concept-Guided Dictionary Learning* (CGDL), a weakly supervised framework that enforces monosemanticity and grounds concepts directly within LVLms, yielding faithful multimodal alignment. CGDL is flexible, efficient, and improves concept quality across dictionary learning methods. Limitations include the lack of hierarchical organization and the requirement that models understand basic language instructions—though this holds for most modern LVLms. Future work will extend CGDL to capture hierarchical concepts and evaluate beyond LVLms.

**Reproducibility Statement** We release a reproducible pipeline requiring only a Hugging Face model card, access token, and dataset directory with train/val splits. CGDL and CoX-LMM can be run via `scripts/run_full_pipeline.sh` and `scripts/run_full_pipeline_dl.sh`, respectively. Code and configs are shared anonymously at <https://anonymous.4open.science/r/xl-vlms-30C1>, with installation and usage detailed in the README. All experiments used a single NVIDIA RTX 3090 (24GB) GPU with fixed random seeds.

**Ethics Statement.** This work poses no direct societal risks beyond those inherent to model interpretability. Our method may surface biased or harmful concepts present in LVLms, which should be interpreted responsibly and not used to reinforce stereotypes.

## REFERENCES

- 486  
487  
488 Guillaume Alain and Yoshua Bengio. Understanding intermediate layers using linear classifier probes,  
489 2018. URL <https://arxiv.org/abs/1610.01644>.
- 490  
491 Hasan Md Tusfiqur Alam, Devansh Srivastav, Md Abdul Kadir, and Daniel Sonntag. Towards inter-  
492 pretable radiology report generation via&nbsp;concept bottlenecks using a&nbsp;multi-agent  
493 rag. In *Advances in Information Retrieval: 47th European Conference on Information Retrieval,  
494 ECIR 2025, Lucca, Italy, April 6–10, 2025, Proceedings, Part III*, pp. 201–209, Berlin, Heidelberg,  
495 2025. Springer-Verlag. ISBN 978-3-031-88713-0. doi: 10.1007/978-3-031-88714-7\_18. URL  
496 [https://doi.org/10.1007/978-3-031-88714-7\\_18](https://doi.org/10.1007/978-3-031-88714-7_18).
- 497  
498 Jacob Devlin, Ming-Wei Chang, Kenton Lee, and Kristina Toutanova. Bert: Pre-training of deep  
499 bidirectional transformers for language understanding. In *Proceedings of NAACL-HLT*, 2019.
- 500  
501 Chris H.Q. Ding, Tao Li, and Michael I. Jordan. Convex and semi-nonnegative matrix factorizations.  
502 *IEEE Transactions on Pattern Analysis and Machine Intelligence*, 32(1):45–55, 2010.
- 503  
504 Maximilian Dreyer, Jim Berend, Tobias Labarta, Johanna Vielhaben, Thomas Wiegand, Sebastian  
505 Lapuschkin, and Wojciech Samek. Mechanistic understanding and validation of large ai models  
506 with semanticons, 2025. URL <https://arxiv.org/abs/2501.05398>.
- 507  
508 Nelson Elhage, Tristan Hume, Catherine Olsson, Nicholas Schiefer, Tom Henighan, Shauna Kravec,  
509 Zac Hatfield-Dodds, Robert Lasenby, Dawn Drain, Carol Chen, Roger Grosse, Sam McCandlish,  
510 Jared Kaplan, Dario Amodei, Martin Wattenberg, and Christopher Olah. Toy models of  
511 superposition, 2022. URL <https://arxiv.org/abs/2209.10652>.
- 512  
513 Thomas Fel, Victor Boutin, Mazda Moayeri, Rémi Cadène, Louis Bethune, Léo andéol, Mathieu  
514 Chalvidal, and Thomas Serre. A holistic approach to unifying automatic concept extraction and  
515 concept importance estimation, 2023a. URL <https://arxiv.org/abs/2306.07304>.
- 516  
517 Thomas Fel, Agustin Picard, Louis Béthune, Thibaut Boissin, David Vigouroux, Julien Colin, Rémi  
518 Cadène, and Thomas Serre. Craft: Concept recursive activation factorization for explainability. In  
519 *Proceedings of the IEEE/CVF Conference on Computer Vision and Pattern Recognition (CVPR)*,  
520 pp. 2711–2721, June 2023b.
- 521  
522 Mor Geva, Roei Schuster, Jonathan Berant, and Omer Levy. Transformer feed-forward layers are  
523 key-value memories. *CoRR*, abs/2012.14913, 2020. URL <https://arxiv.org/abs/2012.14913>.
- 524  
525 Amirata Ghorbani, James Wexler, James Zou, and Been Kim. *Towards automatic concept-based  
526 explanations*. Curran Associates Inc., Red Hook, NY, USA, 2019.
- 527  
528 Mara Graziani, An phi Nguyen, Laura O’Mahony, Henning Müller, and Vincent Andrearczyk.  
529 Concept discovery and dataset exploration with singular value decomposition. In *ICLR 2023  
530 Workshop on Pitfalls of limited data and computation for Trustworthy ML*, 2023. URL <https://openreview.net/forum?id=iOlymD1PtC8>.
- 531  
532 Arne Grobrügge, Niklas Kühl, Gerhard Satzger, and Philipp Spitzer. Towards human-understandable  
533 multi-dimensional concept discovery, 2025. URL <https://arxiv.org/abs/2503.18629>.
- 534  
535 Sarthak Jain and Byron C. Wallace. Attention is not Explanation. In Jill Burstein, Christy Doran,  
536 and Thamar Solorio (eds.), *Proceedings of the 2019 Conference of the North American Chapter  
537 of the Association for Computational Linguistics: Human Language Technologies, Volume 1  
538 (Long and Short Papers)*, pp. 3543–3556, Minneapolis, Minnesota, June 2019. Association for  
539 Computational Linguistics. doi: 10.18653/v1/N19-1357. URL <https://aclanthology.org/N19-1357/>.
- 538  
539 Md Abdul Kadir, Amir Mosavi, and Daniel Sonntag. Evaluation metrics for xai: A review, taxonomy,  
and practical applications. In *2023 IEEE 27th International Conference on Intelligent Engineering  
Systems (INES)*, pp. 000111–000124, 2023. doi: 10.1109/INES59282.2023.10297629.

- 540 Weitai Kang, Gaowen Liu, Mubarak Shah, and Yan Yan. Segvg: Transferring object bounding box to  
541 segmentation for visual grounding, 2024. URL <https://arxiv.org/abs/2407.03200>.
- 542
- 543 Been Kim, Martin Wattenberg, Justin Gilmer, Carrie Cai, James Wexler, Fernanda Viegas, and Rory  
544 Sayres. Interpretability beyond feature attribution: Quantitative testing with concept activation  
545 vectors (tcav), 2018. URL <https://arxiv.org/abs/1711.11279>.
- 546
- 547 Hyunsoo Kim and Haesun Park. Nonnegative matrix factorization based on alternating nonnegativity  
548 constrained least squares and active set method. *SIAM Journal on Matrix Analysis and Applications*,  
549 30(2):713–730, 2008.
- 550 Alexander Kirillov, Eric Mintun, Nikhila Ravi, Hanzi Mao, Chloe Rolland, Laura Gustafson, Tete  
551 Xiao, Spencer Whitehead, Alexander C. Berg, Wan-Yen Lo, Piotr Dollár, and Ross Girshick.  
552 Segment anything, 2023. URL <https://arxiv.org/abs/2304.02643>.
- 553
- 554 Pang Wei Koh, Thao Nguyen, Yew Siang Tang, Stephen Mussmann, Emma Pierson, Been Kim, and  
555 Percy Liang. Concept bottleneck models. In *International conference on machine learning*, pp.  
556 5338–5348. PMLR, 2020.
- 557
- 558 Jingjing Liu, Nian Wu, Xianchao Xiu, and Jianhua Zhang. Robust orthogonal nmf with label  
559 propagation for image clustering. *arXiv preprint arXiv:2504.21472*, 2025.
- 560
- 561 Chuofan Ma, Yi Jiang, Jiannan Wu, Zehuan Yuan, and Xiaojuan Qi. Groma: Localized visual  
562 tokenization for grounding multimodal large language models, 2024. URL <https://arxiv.org/abs/2404.13013>.
- 563
- 564 Kevin Meng, David Bau, Alex Andonian, and Yonatan Belinkov. Locating and editing factual  
565 associations in gpt, 2023. URL <https://arxiv.org/abs/2202.05262>.
- 566
- 567 Tuomas Oikarinen and Tsui-Wei Weng. Clip-dissect: Automatic description of neuron representations  
568 in deep vision networks, 2023. URL <https://arxiv.org/abs/2204.10965>.
- 569
- 570 Mateusz Pach, Shyamgopal Karthik, Quentin Bouniot, Serge Belongie, and Zeynep Akata.  
571 Sparse autoencoders learn monosemantic features in vision-language models. *arXiv preprint*  
572 *arXiv:2504.02821*, 2025.
- 573
- 574 Jayneel Parekh, Pegah Khayatan, Mustafa Shukor, Alasdair Newson, and Matthieu Cord. A concept-  
575 based explainability framework for large multimodal models. *arXiv preprint arXiv:2406.08074*,  
576 2024.
- 577
- 578 Alec Radford, Jong Wook Kim, Chris Hallacy, Aditya Ramesh, Gabriel Goh, Sandhini Agarwal,  
579 Girish Sastry, Amanda Askell, Pamela Mishkin, Jack Clark, Gretchen Krueger, and Ilya Sutskever.  
580 Learning transferable visual models from natural language supervision. In *International Conference*  
581 *on Machine Learning (ICML)*, 2021.
- 582
- 583 Ramprasaath R Selvaraju, Michael Cogswell, Abhishek Das, Ramakrishna Vedantam, Devi Parikh,  
584 and Dhruv Batra. Grad-cam: Visual explanations from deep networks via gradient-based local-  
585 ization. In *Proceedings of the IEEE international conference on computer vision*, pp. 618–626,  
586 2017.
- 587
- 588 Erik Strumbelj and Igor Kononenko. Explaining prediction models and individual predictions with  
589 feature contributions. *Knowledge and Information Systems*, 41:647–665, 2014. URL <https://api.semanticscholar.org/CorpusID:2449098>.
- 590
- 591 Ao Sun, Pingchuan Ma, Yuanyuan Yuan, and Shuai Wang. Explain any concept: Segment anything  
592 meets concept-based explanation, 2023. URL <https://arxiv.org/abs/2305.10289>.
- 593
- 594 Gemma Team. Gemma 3n. 2025a. URL <https://ai.google.dev/gemma/docs/gemma-3n>.
- 595
- 596 Qwen Team. Qwen2.5-vl, January 2025b. URL <https://qwenlm.github.io/blog/qwen2.5-vl/>.

594 Adly Templeton. *Scaling monosemanticity: Extracting interpretable features from claude 3 sonnet*.  
 595 Anthropic, 2024.  
 596

597 George Trigeorgis, Konstantinos Bousmalis, Stefanos Zafeiriou, and Björn W. Schuller. A deep semi-  
 598 nmf model for learning hidden representations. In *Proceedings of the 31st International Conference*  
 599 *on International Conference on Machine Learning - Volume 32, ICML'14*, pp. II–1692–II–1700.  
 600 JMLR.org, 2014.  
 601

602 Peng Wang, Shuai Bai, Sinan Tan, Shijie Wang, Zhihao Fan, Jinze Bai, Keqin Chen, Xuejing Liu,  
 603 Jialin Wang, Wenbin Ge, Yang Fan, Kai Dang, Mengfei Du, Xuancheng Ren, Rui Men, Dayiheng  
 604 Liu, Chang Zhou, Jingren Zhou, and Junyang Lin. Qwen2-vl: Enhancing vision-language model’s  
 605 perception of the world at any resolution. *arXiv preprint arXiv:2409.12191*, 2024.  
 606

607 Hao Zhang, Hongyang Li, Feng Li, Tianhe Ren, Xueyan Zou, Shilong Liu, Shijia Huang, Jianfeng  
 608 Gao, Lei Zhang, Chunyuan Li, and Jianwei Yang. Llava-grounding: Grounded visual chat with  
 609 large multimodal models, 2023. URL <https://arxiv.org/abs/2312.02949>.  
 610

611

## 612 A MONOSEMANTIC VS. POLYSEMANTIC REPRESENTATIONS

613

614 A central challenge in interpreting large vision–language models (LVLMs) lies in *superposition*  
 615 and *feature entanglement* in high-dimensional residual streams (Elhage et al., 2022). Here, *features*  
 616 can be understood as vector directions in activation space that encode candidate concepts. Ideally,  
 617 such vectors should be *monosemantic*—each aligned with a single interpretable concept. In practice,  
 618 however, LVLMs often learn *polysemantic* vectors, where a single direction is activated by multiple,  
 619 semantically unrelated concepts.

620 For instance, in Fig. 4(a), a feature vector  $f_1$  responds to both “cat” and “chair.” Such overlap can  
 621 arise when these concepts frequently co-occur in training data, leading the model to conflate them.  
 622 When  $f_1$  activates, it is therefore ambiguous whether the cause was the presence of a cat, a chair,  
 623 or both. This ambiguity breaks the one-to-one mapping between features and concepts, making  
 624 attribution unreliable.

625 In contrast, monosemantic features (Fig. 4b) provide clean alignment: e.g.

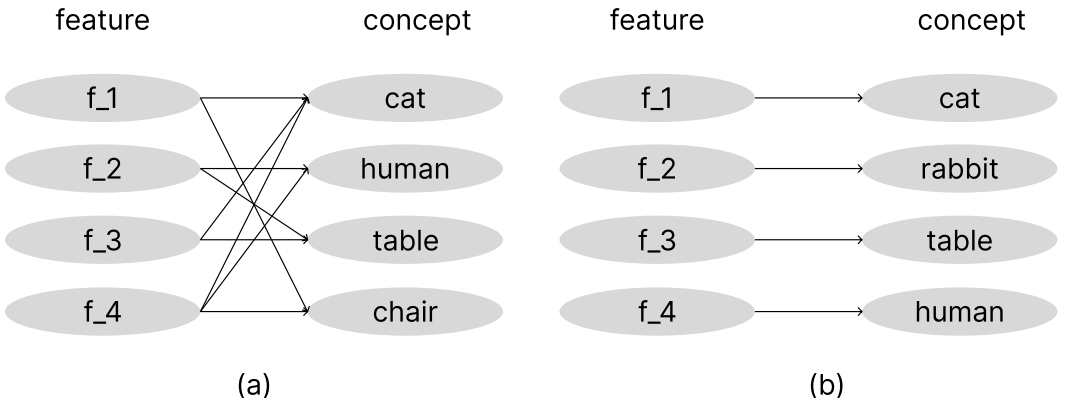

640

641 Figure 4: Comparison between prior concept decomposition methods and our proposed approach. (a)  
 642 Previous methods (e.g., Parekh et al. (2024)) often produce polysemantic features (e.g.,  $f_3$  activates  
 643 for “chair” and “cat”). (b) Our method encourages monosemantic features (e.g.,  $f_1$  for “cat,”  $f_3$  for  
 644 “table”).

645

646 Apart from a limited number of studies Templeton (2024); Pach et al. (2025), most existing models do  
 647 not offer disentangled representations, and tools for analyzing and extracting monosemantic features  
 remain scarce. This paper addresses this gap through **CGDL**.

## B PROMPTS

**Concept generation prompt.** We use the following instruction to extract candidate concept text from images: “*Identify every visible object, item, concept, and pattern in the image. Output only a single-word, comma-separated list. No explanations or sentences.*” This prompt generates concept tokens directly from the dataset without requiring manual labels, thereby creating a concept-to-image mapping.

### Concept-Guidance prompt

- P1: Detect whether the image contains  $c_k$ . If yes, return  $c_k$ ; otherwise, return UNK.
- P2: Does the image contain  $c_k$ ? If yes, output  $c_k$ ; otherwise, output No- $c_k$ .
- P3: Is there a clear instance of  $c_k$  in this image? Reply with  $c_k$  or `thing`, nothing else.
- P4: Recognize whether the concept  $c_k$  is present in the picture. Use only  $c_k$  or UNK as your answer.

## C MODELS

### C.1 GEMMA-3N E4B-IT TEAM (2025A)

Gemma-3n E4B-IT (4-billion-parameter model) is trained using a nested subnetwork approach based on the Matryoshka Transformer (MatFormer) architecture. Each Transformer layer supports multiple capacity levels, implemented as top-left submatrices of full-size weight tensors. The model is instruction-tuned on a mixture of multilingual and multimodal data, including text, images, audio, and video inputs. It is trained autoregressively to predict the next token, with a maximum context length of 32k tokens.

### C.2 QWEN2.5-VL-7B-INSTRUCTTEAM (2025B) AND QWEN2-VL-7B-INSTRUCT WANG ET AL. (2024)

Qwen2.5-VL-7B-Instruct is a 7-billion parameter multimodal instruction-tuned language model, designed for vision-language tasks. It accepts both text and image inputs and generates text outputs. The model supports a maximum context length of 8192 tokens, enabling it to handle long conversational and reasoning scenarios. Training is performed via supervised instruction tuning on paired text-image datasets. The model is optimized with an autoregressive next-token prediction objective using cross-entropy loss, conditioning on both textual and visual contexts. Large-scale distributed training with mixed precision improves efficiency. This approach enhances the model’s instruction-following capabilities and generalization to diverse vision-language tasks.

## D DATASET DESCRIPTIONS

We evaluate our models on four datasets: **ImageNet**, **MSCOCO (10 classes)**, **CIFAR100**, and **DTD (Describable Textures Dataset)**.

- **ImageNet**: A large-scale visual dataset with 1000 object categories and high-resolution images, commonly used for image classification tasks.
- **MSCOCO (10 classes)**: A subset of the MSCOCO dataset with 10 object categories, featuring complex scenes and multiple annotated objects per image.

## E RESULTS

### E.1 QWEN2

Table 6 reports the performance of **CGDL** and **CoX-LMM** on four benchmark datasets. We evaluate alignment using **CLIPScore (CS)** and **BERTScore (BS)**, where higher is better.

| Dataset     | Total Classes | Train Samples/Class | Val Samples/Class |
|-------------|---------------|---------------------|-------------------|
| ImageNet    | 1000          | 300                 | 50                |
| MSCOCO (10) | 10            | 300                 | 50                |
| CIFAR100    | 100           | 300                 | 100               |
| DTD         | 47            | 95                  | 24                |

Table 5: Overview of datasets used for training and validation, including number of classes and samples per class.

Table 6: Comparison of **CGDL** and **CoX-LMM** across datasets. Metrics: CS = CLIPScore, BS = BERTScore. Higher is better. Best non-random results are **bolded**.

| Method  | Dataset  | #C  | Metric | Rand            | Text                              | Img                               | Comb                              |
|---------|----------|-----|--------|-----------------|-----------------------------------|-----------------------------------|-----------------------------------|
| CGDL    | ImageNet | 1k  | CS     | $0.53 \pm 0.02$ | –                                 | <b><math>0.62 \pm 0.07</math></b> | <b><math>0.63 \pm 0.08</math></b> |
|         |          |     | BS     | $0.80 \pm 0.05$ | <b><math>0.86 \pm 0.06</math></b> | <b><math>0.88 \pm 0.08</math></b> | <b><math>0.86 \pm 0.09</math></b> |
|         | CIFAR100 | 100 | CS     | $0.51 \pm 0.02$ | –                                 | <b><math>0.63 \pm 0.04</math></b> | <b><math>0.63 \pm 0.05</math></b> |
|         |          |     | BS     | $0.83 \pm 0.08$ | <b><math>0.86 \pm 0.07</math></b> | <b><math>0.87 \pm 0.08</math></b> | <b><math>0.91 \pm 0.08</math></b> |
|         | DTD      | 47  | CS     | $0.53 \pm 0.06$ | –                                 | <b><math>0.63 \pm 0.05</math></b> | <b><math>0.62 \pm 0.05</math></b> |
|         |          |     | BS     | $0.74 \pm 0.04$ | <b><math>0.84 \pm 0.06</math></b> | <b><math>0.83 \pm 0.07</math></b> | <b><math>0.87 \pm 0.06</math></b> |
|         | MSCOCO   | 10  | CS     | $0.52 \pm 0.03$ | –                                 | <b><math>0.64 \pm 0.06</math></b> | <b><math>0.62 \pm 0.06</math></b> |
|         |          |     | BS     | $0.82 \pm 0.02$ | <b><math>0.88 \pm 0.06</math></b> | <b><math>0.89 \pm 0.05</math></b> | <b><math>0.94 \pm 0.08</math></b> |
| CoX-LMM | ImageNet | 1k  | CS     | $0.53 \pm 0.03$ | –                                 | $0.54 \pm 0.03$                   | $0.53 \pm 0.05$                   |
|         |          |     | BS     | $0.82 \pm 0.04$ | $0.82 \pm 0.03$                   | $0.84 \pm 0.04$                   | $0.86 \pm 0.09$                   |
|         | CIFAR100 | 100 | CS     | $0.53 \pm 0.04$ | –                                 | $0.53 \pm 0.06$                   | $0.53 \pm 0.05$                   |
|         |          |     | BS     | $0.78 \pm 0.06$ | $0.84 \pm 0.06$                   | $0.80 \pm 0.03$                   | $0.73 \pm 0.07$                   |
|         | DTD      | 47  | CS     | $0.51 \pm 0.05$ | –                                 | $0.54 \pm 0.05$                   | $0.52 \pm 0.05$                   |
|         |          |     | BS     | $0.80 \pm 0.07$ | $0.84 \pm 0.06$                   | $0.83 \pm 0.07$                   | $0.77 \pm 0.07$                   |
|         | MSCOCO   | 10  | CS     | $0.53 \pm 0.03$ | –                                 | $0.57 \pm 0.04$                   | $0.58 \pm 0.06$                   |
|         |          |     | BS     | $0.82 \pm 0.04$ | $0.83 \pm 0.01$                   | $0.83 \pm 0.05$                   | $0.82 \pm 0.03$                   |

Across all datasets, CGDL consistently outperforms CoX-LMM. Notably, on **MSCOCO**, CGDL achieves the strongest gains: BS improves from 0.82 (CoX-LMM) to **0.94**, and CS improves from 0.58 to **0.64**. Similarly, on **CIFAR100**, the BS of CoX-LMM drops to 0.73 in the combined setting, while CGDL achieves a significantly higher **0.91**. These results highlight the robustness of CGDL in both low- and high-concept regimes.

## E.2 QWEN2.5

Table 7 shows results for the Qwen2.5 backbone. Again, CGDL achieves the strongest improvements across all datasets. In particular, on **MSCOCO**, CGDL improves BS from 0.90 to **0.95** in the combined setting. On **CIFAR100**, CGDL reaches **0.92**, compared to 0.87 with CoX-LMM. These consistent gains indicate that CGDL scales effectively from small (10 concepts) to large-scale (1k concepts) benchmarks.

756  
757  
758  
759  
760  
761  
762  
763  
764  
765  
766  
767  
768  
769  
770  
771  
772  
773  
774  
775  
776  
777  
778  
779  
780  
781  
782  
783  
784  
785  
786  
787  
788  
789  
790  
791  
792  
793  
794  
795  
796  
797  
798  
799  
800  
801  
802  
803  
804  
805  
806  
807  
808  
809

| Method  | Dataset  | #C  | Metric | Rand            | Text                              | Img                               | Comb                              |
|---------|----------|-----|--------|-----------------|-----------------------------------|-----------------------------------|-----------------------------------|
| CGDL    | ImageNet | 1k  | CS     | $0.51 \pm 0.06$ | –                                 | <b><math>0.63 \pm 0.06</math></b> | <b><math>0.64 \pm 0.05</math></b> |
|         |          |     | BS     | $0.82 \pm 0.04$ | <b><math>0.87 \pm 0.01</math></b> | <b><math>0.88 \pm 0.07</math></b> | <b><math>0.87 \pm 0.07</math></b> |
|         | MSCOCO   | 10  | CS     | $0.53 \pm 0.05$ | –                                 | <b><math>0.64 \pm 0.07</math></b> | <b><math>0.64 \pm 0.08</math></b> |
|         |          |     | BS     | $0.83 \pm 0.06$ | <b><math>0.89 \pm 0.07</math></b> | <b><math>0.90 \pm 0.06</math></b> | <b><math>0.95 \pm 0.08</math></b> |
|         | CIFAR100 | 100 | CS     | $0.50 \pm 0.07$ | –                                 | <b><math>0.62 \pm 0.05</math></b> | <b><math>0.64 \pm 0.06</math></b> |
|         |          |     | BS     | $0.80 \pm 0.08$ | <b><math>0.88 \pm 0.06</math></b> | <b><math>0.88 \pm 0.09</math></b> | <b><math>0.92 \pm 0.07</math></b> |
|         | DTD      | 47  | CS     | $0.51 \pm 0.06$ | –                                 | <b><math>0.63 \pm 0.08</math></b> | <b><math>0.63 \pm 0.07</math></b> |
|         |          |     | BS     | $0.79 \pm 0.07$ | <b><math>0.87 \pm 0.07</math></b> | <b><math>0.85 \pm 0.09</math></b> | <b><math>0.89 \pm 0.08</math></b> |
| CoX-LMM | ImageNet | 1k  | CS     | $0.51 \pm 0.05$ | –                                 | $0.56 \pm 0.04$                   | $0.55 \pm 0.06$                   |
|         |          |     | BS     | $0.81 \pm 0.06$ | $0.83 \pm 0.04$                   | $0.85 \pm 0.06$                   | $0.86 \pm 0.03$                   |
|         | CIFAR100 | 100 | CS     | $0.53 \pm 0.07$ | –                                 | $0.58 \pm 0.06$                   | $0.57 \pm 0.04$                   |
|         |          |     | BS     | $0.78 \pm 0.07$ | $0.84 \pm 0.06$                   | $0.85 \pm 0.05$                   | $0.87 \pm 0.06$                   |
|         | MSCOCO   | 10  | CS     | $0.52 \pm 0.03$ | –                                 | $0.60 \pm 0.03$                   | $0.60 \pm 0.02$                   |
|         |          |     | BS     | $0.81 \pm 0.04$ | $0.88 \pm 0.04$                   | $0.90 \pm 0.04$                   | $0.90 \pm 0.07$                   |
|         | DTD      | 47  | CS     | $0.53 \pm 0.03$ | –                                 | $0.56 \pm 0.03$                   | $0.56 \pm 0.06$                   |
|         |          |     | BS     | $0.81 \pm 0.04$ | $0.83 \pm 0.05$                   | $0.82 \pm 0.06$                   | $0.88 \pm 0.05$                   |

Table 7: Comparison of CGDL and CoX-LMM across datasets using CLIPScore (CS) and BERTScore (BS). Best non-random results are **bolded**.
